# Supplementary material
Source: PubMed Central journal article supplement (PMC11343583)

**Supplemental Figure 1.** Forest plots and of meta-analysis of association between A) red meat intake and B) processed meat intake and CRC; and funnel plots for C) red meat intake and D) processed meat intake.

A)

| Source                                                            | Control | Case | N     | OR   | 95% CI       | Weight |
|-------------------------------------------------------------------|---------|------|-------|------|--------------|--------|
| <b>study_design = Cohort</b>                                      |         |      |       |      |              |        |
| ATBC                                                              | 31      | 140  | 171   | 2.88 | [0.90; 9.17] | 0.7%   |
| CLUEII                                                            | 238     | 225  | 463   | 2.49 | [0.93; 6.66] | 1.0%   |
| CPSII                                                             | 868     | 870  | 1738  | 1.21 | [0.93; 1.59] | 4.3%   |
| EPIC                                                              | 2218    | 1916 | 4134  | 1.16 | [0.98; 1.38] | 5.1%   |
| HPFS                                                              | 589     | 574  | 1163  | 1.17 | [0.97; 1.41] | 5.0%   |
| MCCS                                                              | 672     | 752  | 1424  | 1.06 | [0.84; 1.34] | 4.6%   |
| MEC                                                               | 417     | 370  | 787   | 0.97 | [0.75; 1.26] | 4.4%   |
| NHS                                                               | 1113    | 757  | 1870  | 1.28 | [1.00; 1.63] | 4.5%   |
| NHSII                                                             | 98      | 105  | 203   | 1.32 | [0.70; 2.51] | 1.9%   |
| PHS                                                               | 378     | 366  | 744   | 0.96 | [0.66; 1.41] | 3.3%   |
| PLCO                                                              | 3698    | 969  | 4667  | 1.25 | [1.06; 1.48] | 5.2%   |
| SELECT                                                            | 267     | 261  | 528   | 1.07 | [0.69; 1.66] | 2.9%   |
| SMC_COSM                                                          | 850     | 530  | 1380  | 1.14 | [0.91; 1.42] | 4.7%   |
| UKB                                                               | 10904   | 2740 | 13644 | 1.92 | [1.38; 2.65] | 3.8%   |
| VITAL                                                             | 258     | 240  | 498   | 1.31 | [0.77; 2.21] | 2.4%   |
| WHI                                                               | 2066    | 1980 | 4046  | 1.11 | [0.94; 1.30] | 5.2%   |
| Total                                                             |         |      |       | 1.21 | [1.08; 1.35] | 58.8%  |
| Heterogeneity: $\chi^2_{15} = 19.25$ ( $P = .20$ ), $I^2 = 22\%$  |         |      |       |      |              |        |
| <b>study_design = Case-Control</b>                                |         |      |       |      |              |        |
| ASTERISK                                                          | 937     | 860  | 1797  | 2.76 | [1.35; 5.61] | 1.6%   |
| CCFR                                                              | 2103    | 2950 | 5053  | 1.24 | [1.07; 1.42] | 5.4%   |
| Colo2&3                                                           | 121     | 87   | 208   | 0.97 | [0.43; 2.20] | 1.3%   |
| CRCGEN                                                            | 995     | 800  | 1795  | 1.27 | [0.89; 1.79] | 3.6%   |
| DACHS                                                             | 2779    | 3509 | 6288  | 1.68 | [1.43; 1.98] | 5.2%   |
| DALS                                                              | 1163    | 1099 | 2262  | 1.28 | [1.07; 1.54] | 5.0%   |
| Kentucky                                                          | 1009    | 845  | 1854  | 1.53 | [1.23; 1.91] | 4.7%   |
| LCCS                                                              | 674     | 1177 | 1851  | 1.68 | [1.10; 2.57] | 3.0%   |
| MECC                                                              | 4055    | 4894 | 8949  | 2.02 | [1.61; 2.52] | 4.7%   |
| NCCCSI                                                            | 448     | 236  | 684   | 1.42 | [0.94; 2.17] | 3.1%   |
| NCCCSII                                                           | 686     | 590  | 1276  | 0.97 | [0.68; 1.37] | 3.6%   |
| Total                                                             |         |      |       | 1.45 | [1.22; 1.72] | 41.2%  |
| Heterogeneity: $\chi^2_{10} = 28.63$ ( $P = .001$ ), $I^2 = 65\%$ |         |      |       |      |              |        |
| Total                                                             |         |      |       | 1.30 | [1.18; 1.44] | 100.0% |

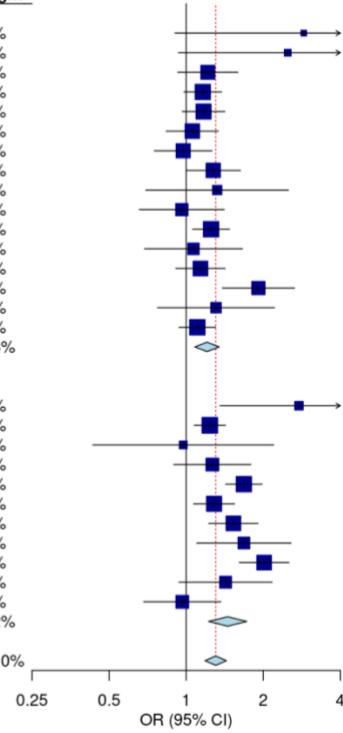

Heterogeneity:  $\chi^2_{26} = 64.24$  ( $P < .001$ ),  $I^2 = 60\%$   
 Test for subgroup differences:  $\chi^2_1 = 3.97$  ( $P = .05$ )

C)

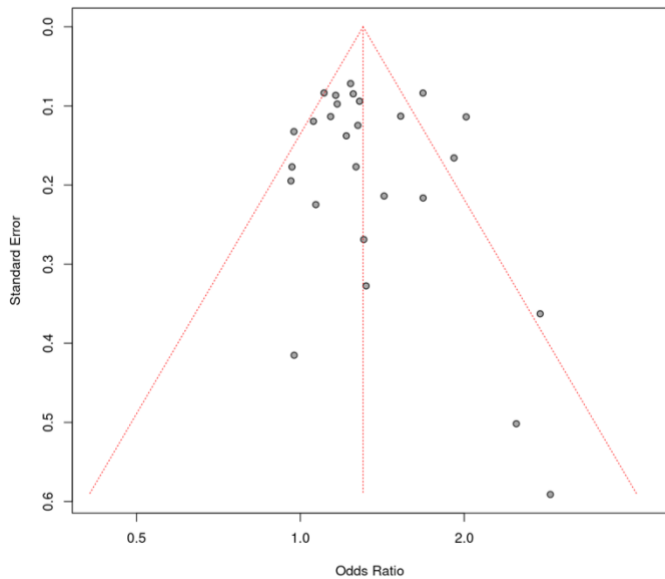

B)

| Source                                                           | Control | Case | N     | OR   | 95% CI        | Weight |
|------------------------------------------------------------------|---------|------|-------|------|---------------|--------|
| <b>study_design = Cohort</b>                                     |         |      |       |      |               |        |
| ATBC                                                             | 31      | 140  | 171   | 1.05 | [0.43; 2.58]  | 2.1%   |
| CLUEII                                                           | 237     | 224  | 461   | 0.81 | [0.34; 1.94]  | 2.2%   |
| CPSII                                                            | 868     | 870  | 1738  | 1.21 | [0.55; 2.69]  | 2.5%   |
| EPIC                                                             | 2218    | 1916 | 4134  | 1.14 | [0.92; 1.40]  | 6.6%   |
| HPFS                                                             | 505     | 475  | 980   | 2.14 | [1.28; 3.57]  | 4.1%   |
| MCCS                                                             | 672     | 752  | 1424  | 1.12 | [0.72; 1.74]  | 4.7%   |
| MEC                                                              | 417     | 370  | 787   | 2.44 | [1.08; 5.49]  | 2.4%   |
| NHS                                                              | 1111    | 757  | 1868  | 1.05 | [0.67; 1.64]  | 4.6%   |
| NHSII                                                            | 98      | 105  | 203   | 0.95 | [0.05; 18.17] | 0.3%   |
| PHS                                                              | 378     | 366  | 744   | 1.36 | [0.51; 3.64]  | 1.8%   |
| PLCO                                                             | 3698    | 969  | 4667  | 1.55 | [0.86; 2.80]  | 3.5%   |
| SELECT                                                           | 268     | 262  | 530   | 0.59 | [0.33; 1.06]  | 3.5%   |
| SMC_COSM                                                         | 841     | 525  | 1366  | 1.08 | [0.76; 1.53]  | 5.4%   |
| UKB                                                              | 10888   | 2736 | 13624 | 1.29 | [0.99; 1.69]  | 6.2%   |
| VITAL                                                            | 258     | 240  | 498   | 1.13 | [0.49; 2.60]  | 2.3%   |
| WHI                                                              | 2069    | 1983 | 4052  | 0.88 | [0.67; 1.16]  | 6.1%   |
| Total                                                            |         |      |       | 1.16 | [0.98; 1.37]  | 58.1%  |
| Heterogeneity: $\chi^2_{15} = 20.3$ ( $P = .16$ ), $I^2 = 26\%$  |         |      |       |      |               |        |
| <b>study_design = Case-Control</b>                               |         |      |       |      |               |        |
| CCFR                                                             | 1271    | 1293 | 2564  | 2.41 | [1.50; 3.85]  | 4.4%   |
| Colo2&3                                                          | 121     | 87   | 208   | 0.95 | [0.44; 2.04]  | 2.6%   |
| CRCGEN                                                           | 995     | 800  | 1795  | 0.98 | [0.72; 1.34]  | 5.7%   |
| DACHS                                                            | 2779    | 3509 | 6288  | 1.55 | [1.36; 1.78]  | 7.2%   |
| DALS                                                             | 1163    | 1099 | 2262  | 2.14 | [1.22; 3.74]  | 3.7%   |
| Kentucky                                                         | 1007    | 844  | 1851  | 1.30 | [0.77; 2.20]  | 4.0%   |
| LCCS                                                             | 675     | 1176 | 1851  | 1.38 | [1.02; 1.87]  | 5.8%   |
| MECC                                                             | 4055    | 4894 | 8949  | 2.05 | [1.60; 2.63]  | 6.3%   |
| NCCCSII                                                          | 686     | 590  | 1276  | 2.05 | [0.85; 4.98]  | 2.1%   |
| Total                                                            |         |      |       | 1.56 | [1.22; 2.00]  | 41.9%  |
| Heterogeneity: $\chi^2_{6} = 20.56$ ( $P = .008$ ), $I^2 = 61\%$ |         |      |       |      |               |        |
| Total                                                            |         |      |       | 1.31 | [1.14; 1.52]  | 100.0% |

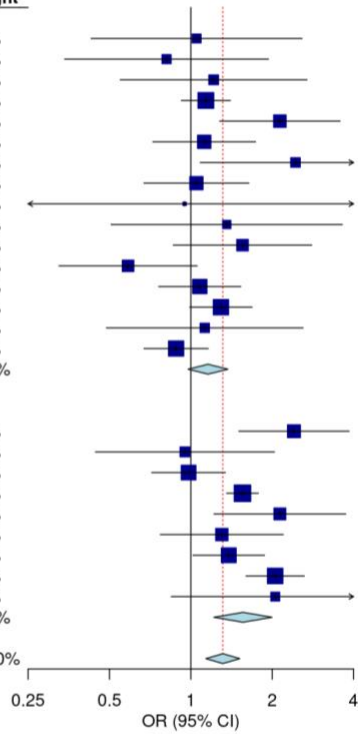

Heterogeneity:  $\chi^2_{24} = 59.47$  ( $P < .001$ ),  $I^2 = 60\%$   
 Test for subgroup differences:  $\chi^2_1 = 4.93$  ( $P = .03$ )

D)

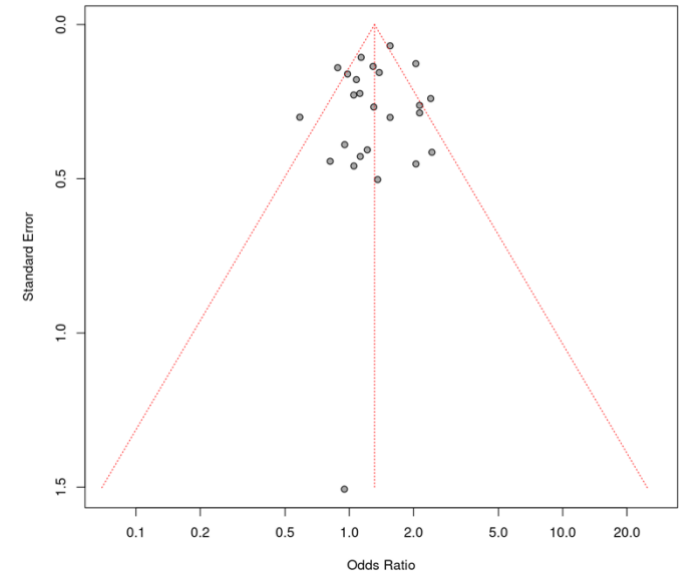

Supplement: NIHMS1954555-supplement-4.pdf [file NIHMS1954555-supplement-4.pdf]
