# Supplementary material
Source: PubMed Central journal article supplement (PMC11343583)
Supplement: NIHMS1954555-supplement-2.pdf [file NIHMS1954555-supplement-2.pdf]

**Supplementary Table 1.** Description and count of participants in the participation studies.

| Study Acronym | Study Name                                                                   | Study Design | Country                | Genotyping Platform                | N Cases | N Controls |
|---------------|------------------------------------------------------------------------------|--------------|------------------------|------------------------------------|---------|------------|
| ASTERISK      | Association Study Evaluating RISK for sporadic colorectal cancer             | case-control | France                 | Illumina 300K                      | 860     | 937        |
| ATBC          | Alpha-Tocopherol, Beta Carotene Cancer Prevention Study                      | cohort       | Finland                | Illumina Oncoarray                 | 140     | 31         |
| CCFR_1        | Colon Cancer Family Registry                                                 | case-control | USA, Canada, Australia | Illumina 1M, 1M duo                | 1005    | 926        |
| CCFR_3        | Colon Cancer Family Registry                                                 | case-control | USA, Canada, Australia | Affymetrix Axiom                   | 869     | 622        |
| CCFR_4        | Colon Cancer Family Registry                                                 | case-control | USA, Canada, Australia | Illumina Oncoarray                 | 1131    | 604        |
| CLUEII        | Campaign against Cancer and Heart Disease II                                 | cohort       | USA                    | Illumina Oncoarray+ custom iSelect | 225     | 239        |
| Colo2&3       | Hawai'i Colorectal Cancer Studies 2&3                                        | case-series  | USA                    | Illumina 300K                      | 87      | 121        |
| CPSII_1       | American Cancer Society Cancer Prevention Study II nested case-control study | cohort       | USA                    | Affymetrix Axiom                   | 531     | 527        |
| CPSII_2       | American Cancer Society Cancer Prevention Study II nested case-control study | cohort       | USA                    | Illumina Oncoarray+ custom iSelect | 339     | 341        |
| CRCGEN        | Colorectal Cancer Genetics & Genomics, Spanish study                         | case-control | Spain                  | Illumina Oncoarray                 | 800     | 995        |

|          |                                                              |              |           |                                    |      |      |
|----------|--------------------------------------------------------------|--------------|-----------|------------------------------------|------|------|
| DACHS_1  | Darmkrebs: Chancen der Verhütung durch Screening             | case-control | Germany   | Illumina 300K                      | 1647 | 1673 |
| DACHS_2  | Darmkrebs: Chancen der Verhütung durch Screening             | case-control | Germany   | Illumina OmniExpress               | 651  | 487  |
| DACHS_3  | Darmkrebs: Chancen der Verhütung durch Screening Study       | case-control | Germany   | Illumina OmniExpressExome          | 1211 | 619  |
| DALS_1   | Diet, Activity and Lifestyle Study                           | case-control | USA       | Illumina 300K                      | 700  | 702  |
| DALS_2   | Diet, Activity and Lifestyle Study                           | case-control | USA       | Illumina 550K, 610K                | 399  | 461  |
| EPIC     | European Prospective Investigation into Cancer and Nutrition | cohort       | Europe    | Illumina OmniExpressExome          | 1916 | 2218 |
| HPFS_1   | Health Professionals Follow-Up Study                         | cohort       | USA       | Illumina OmniExpressExome          | 223  | 226  |
| HPFS_2   | Health Professionals Follow-Up Study                         | cohort       | USA       | Illumina OmniExpressExome          | 172  | 166  |
| HPFS_4   | Health Professionals Follow-Up Study                         | cohort       | USA       | Illumina OmniExpress               | 179  | 197  |
| Kentucky | Kentucky Case-Control Study                                  | case-control | USA       | Affymetrix Axiom                   | 853  | 1023 |
| LCCS     | Leeds Colorectal Cancer Study                                | case-control | UK        | Illumina Oncoarray+ custom iSelect | 1180 | 675  |
| MCCS_1   | Melbourne Collaborative Cohort Study                         | cohort       | Australia | Affymetrix Axiom                   | 534  | 460  |
| MCCS_2   | Melbourne Collaborative Cohort Study                         | cohort       | Australia | Affymetrix Axiom                   | 218  | 212  |
| MEC_1    | Multiethnic Cohort Study                                     | cohort       | USA       | Illumina 300K                      | 307  | 328  |

|                    |                                                                |              |        |                                         |      |      |
|--------------------|----------------------------------------------------------------|--------------|--------|-----------------------------------------|------|------|
| MEC_2              | Multiethnic Cohort Study                                       | cohort       | USA    | Illumina 300K                           | 63   | 89   |
| MECC_1             | Molecular Epidemiology of Colorectal Cancer study              | case-control | Israel | Illumina Omni 2.5                       | 433  | 430  |
| MECC_2             | Molecular Epidemiology of Colorectal Cancer study              | case-control | Israel | Affymetrix Axiom                        | 1041 | 942  |
| MECC_3             | Molecular Epidemiology of Colorectal Cancer study              | case-control | Israel | Illumina Oncoarray<br>Illumina Infinium | 3420 | 2683 |
| NCCCSI             | North Carolina Colon Cancer Study, I                           | case-control | USA    | Oncoarray+<br>custom iSelect            | 236  | 448  |
| NCCCSII            | North Carolina Colon Cancer Study, II                          | case-control | USA    | Illumina Oncoarray+<br>custom iSelect   | 590  | 686  |
| NHS_1              | Nurses' Health Study                                           | cohort       | USA    | Illumina OmniExpress                    | 355  | 694  |
| NHS_2              | Nurses' Health Study                                           | cohort       | USA    | Illumina OmniExpress                    | 137  | 155  |
| NHS_4              | Nurses' Health Study                                           | cohort       | USA    | Illumina OmniExpressExome               | 265  | 264  |
| NHSII              | Nurses' Health Study II                                        | cohort       | USA    | Illumina Oncoarray                      | 105  | 98   |
| PHS                | Physicians' Health Study                                       | cohort       | USA    | Illumina OmniExpress                    | 366  | 378  |
| PLCO_1_R<br>ematch | Prostate, Lung, Colorectal, and Ovarian Cancer Screening Trial | cohort       | USA    | Illumina 300/240S & 610K                | 430  | 285  |
| PLCO_2             | Prostate, Lung, Colorectal, and Ovarian Cancer Screening Trial | cohort       | USA    | Illumina 300K                           | 411  | 330  |

|                   |                                                                      |                   |        |                                          |      |       |
|-------------------|----------------------------------------------------------------------|-------------------|--------|------------------------------------------|------|-------|
| PLCO_3            | Prostate, Lung, Colorectal,<br>and Ovarian Cancer<br>Screening Trial | cohort            | USA    | ILLUMINA 300K                            | 128  | 3083  |
| SELECT            | Selenium and Vitamin E<br>Prevention Trial                           | clinical<br>trial | USA    | ILLUMINA<br>ONCOARRAY+<br>CUSTOM ISELECT | 262  | 268   |
| SMC_COS<br>M      | Swedish Mammography<br>Cohort and Cohort of Swedish<br>Men           | cohort            | Sweden | ILLUMINA ONCOARRAY                       | 530  | 850   |
| UKB_1             | UK Biobank                                                           | cohort            | UK     | UK Biobank Axiom                         | 2740 | 10904 |
| VITAL             | VITamins And Lifestyle                                               | cohort            | USA    | ILLUMINA 300K                            | 240  | 258   |
| WHI_1_Re<br>match | Women's Health Initiative<br>Study                                   | cohort            | USA    | ILLUMINA 550K,<br>550KDUO, 610K          | 451  | 519   |
| WHI_2             | Women's Health Initiative<br>Study                                   | cohort            | USA    | ILLUMINA 300K                            | 976  | 991   |
| WHI_3             | Women's Health Initiative<br>Study                                   | cohort            | USA    | ILLUMINA<br>ONCOARRAY+<br>CUSTOM ISELECT | 556  | 559   |
