# Supplementary material
Source: PubMed Central journal article supplement (PMC11343583)
Supplement: NIHMS1954555-supplement-3.pdf [file NIHMS1954555-supplement-3.pdf]

**Supplementary Table 2.** Sensitivity analysis from genome-wide interaction scans for red meat consumption adjusted for Body Mass Index (BMI).

| SNP        | Chr | Gene                       | Main Results model <sup>a</sup> |                | BMI-adjusted model <sup>b</sup> |                |
|------------|-----|----------------------------|---------------------------------|----------------|---------------------------------|----------------|
|            |     |                            | OR<br>(95% CI)                  | P-value<br>GxE | OR<br>(95% CI)                  | P-value<br>GxE |
| rs4871179  | 8   | <i>Downstream<br/>HAS2</i> | 0.88 (0.83-0.92)                | 1.00E-06       | 0.88 (0.83-0.93)                | 2.74E-06       |
| rs35352860 | 18  | <i>SMAD7</i>               | 1.13 (1.06-1.20)                | 2.0E-8         | 1.13 (1.07-1.20)                | 5.11E-05       |

SNP, single nucleotide polymorphism; Chr, chromosome; OR, Odds Ratio; CI, Confidence Interval.

<sup>a</sup> Multiplicative interaction terms were modelled as the product of red meat and each SNP of interest. Adjusted for age, sex, total energy intake (kcal/day), study, and first three principal components for population stratification.

<sup>b</sup> BMI (as continuous variable), cross-product interaction term between BMI and red meat intake (servings/day) & cross-product interaction term between BMI and each SNP were fitted into regression model <sup>a</sup>.
