# Supplementary material
Source: PubMed Central journal article supplement (PMC11343583)
Supplement: NIHMS1954555-supplement-5.pdf [file NIHMS1954555-supplement-5.pdf]

**Supplemental Figure 2.** Quantile-quantile plots of genome-wide interaction scans for red meat and processed meat.

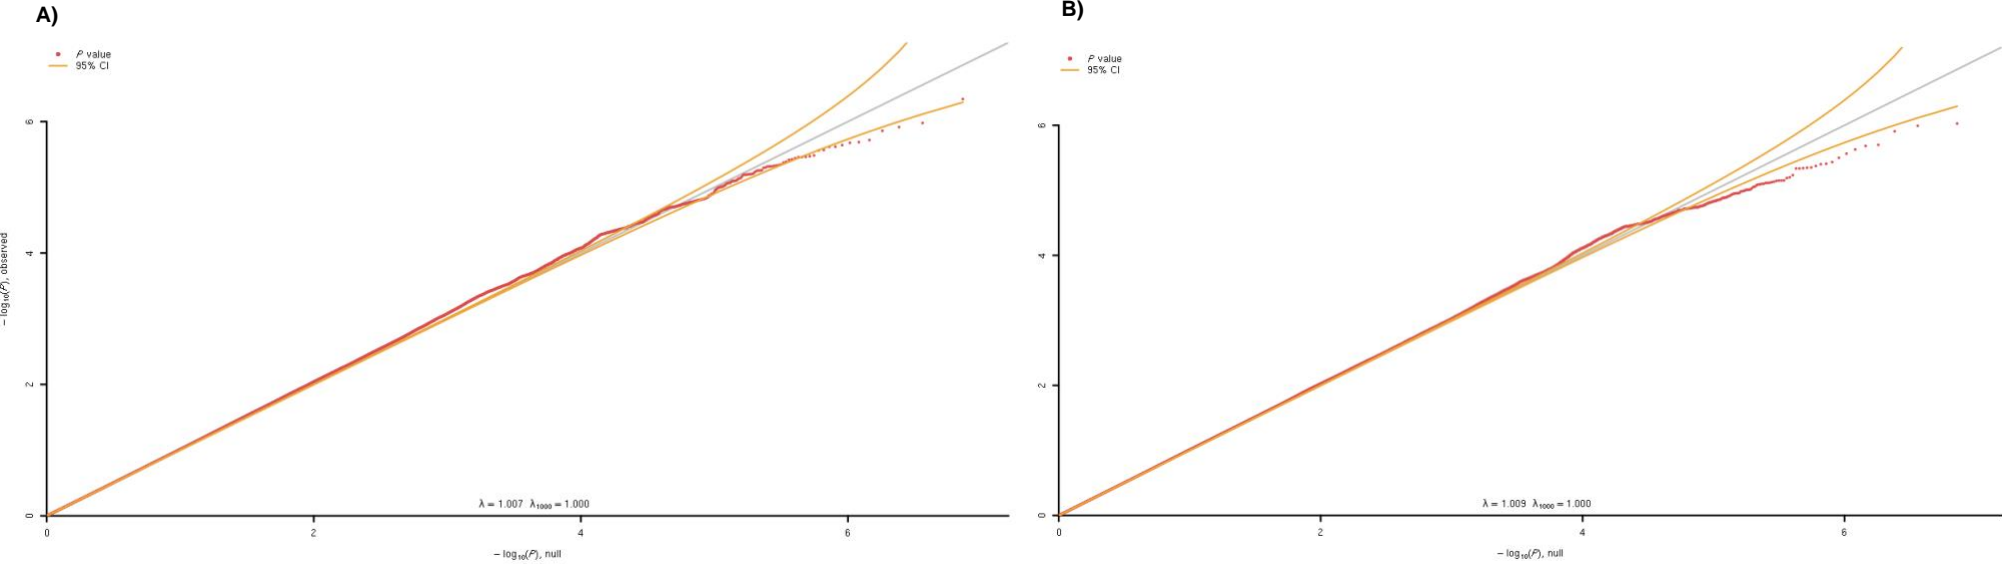

A) Red Meat, B) Processed Meat

P-values correspond to GxE association (1df test).
