# Supplementary material
Source: PubMed Central journal article supplement (PMC11343583)
Supplement: NIHMS1954555-supplement-6.pdf [file NIHMS1954555-supplement-6.pdf]

**Supplemental Figure 3.** Association of red meat intake and CRC risk stratified by variant genotypes.

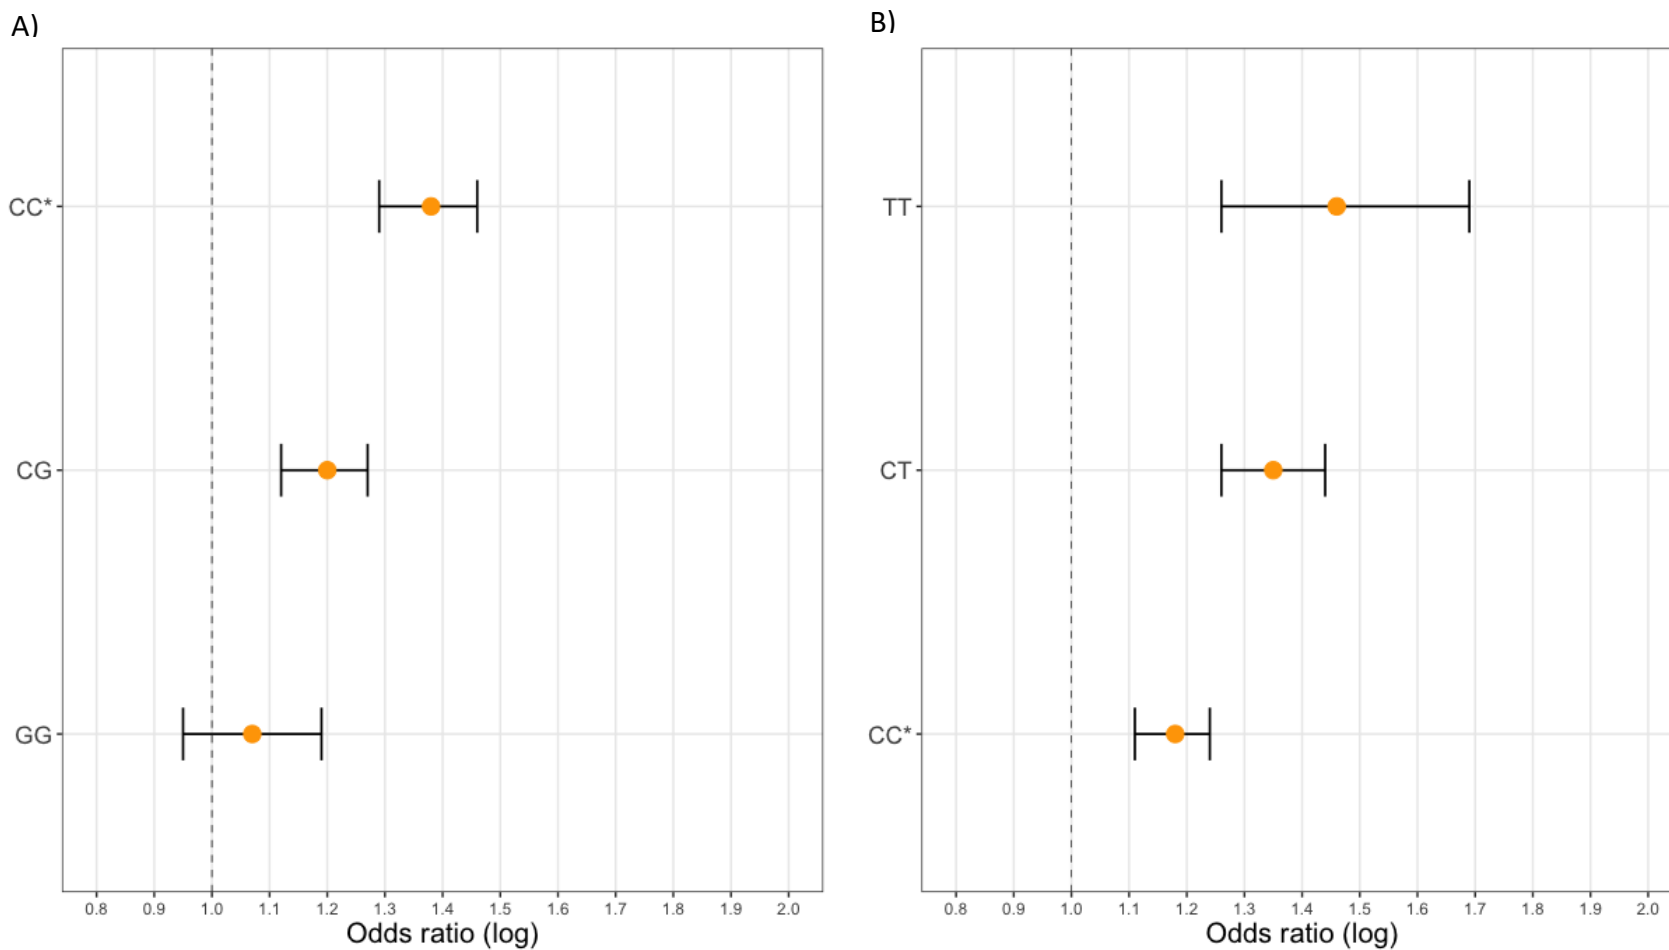

Genotypes were defined by main results from genome-wide analysis (Table 3): A) rs4871179 (Chr 8, downstream *HAS2*), B) rs35352860 (Chr 18, intron *SMAD7*).  
\*Denotes reference allele.
