# Supplementary material
Source: PubMed Central journal article supplement (PMC11343583)
Supplement: NIHMS1954555-supplement-7.pdf [file NIHMS1954555-supplement-7.pdf]

**Supplemental Figure 4.** Regional plots for GxE interaction findings.

B)

redmeatqcm\_v2 x chr8:122247679 – chiSq2df

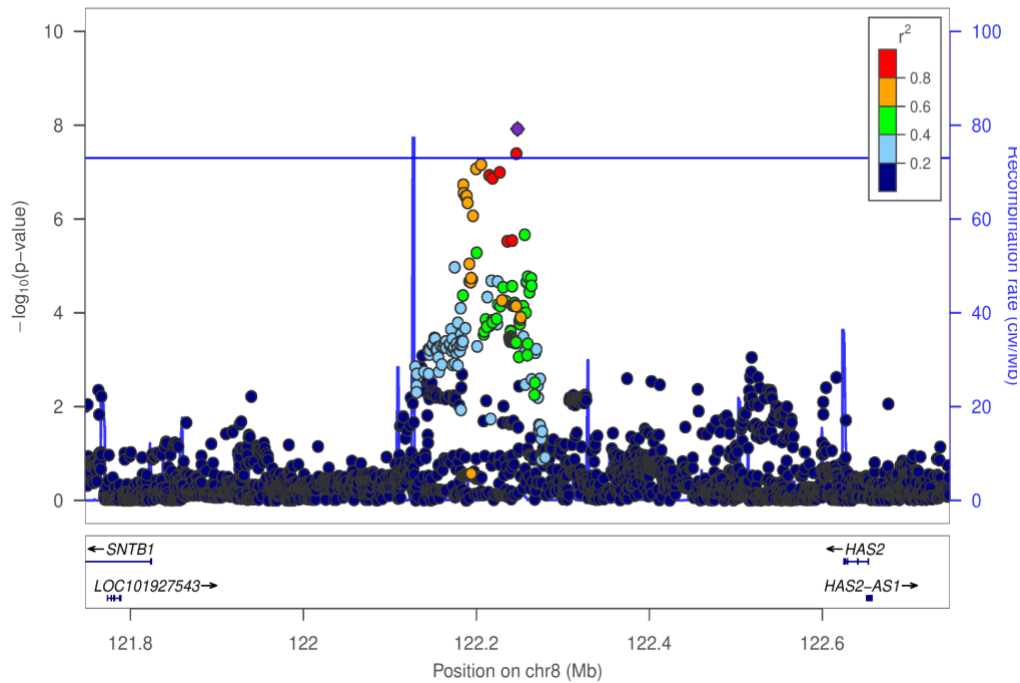

A)

redmeatqcm\_v2 x chr18:46453754 – chiSqGxE

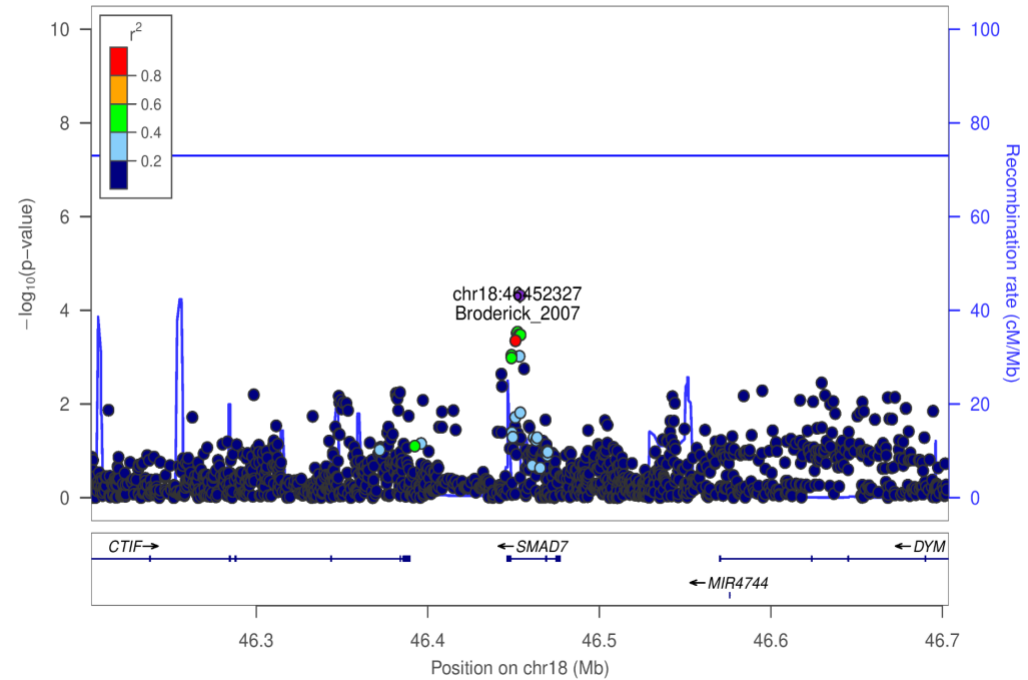

Main area corresponds to the scatter plot of association between P-values vs. chromosomal position. Point colors indicate LD relative to lead genetic variants in the region. A) rs4871179 (Chr 8, downstream *HAS2*), B) rs35352860 (Chr 18, intron *SMAD7*).

<sup>a</sup>Plot shows 1DF p-value. Overall p-value via 2-step method is <math>5E-08</math>.
