# Supplementary material
Source: PubMed Central journal article supplement (PMC11343583)
Supplement: NIHMS1954555-supplement-8.pdf [file NIHMS1954555-supplement-8.pdf]

Supplemental Figure 5. Functional annotation plots for GxE findings.

A)

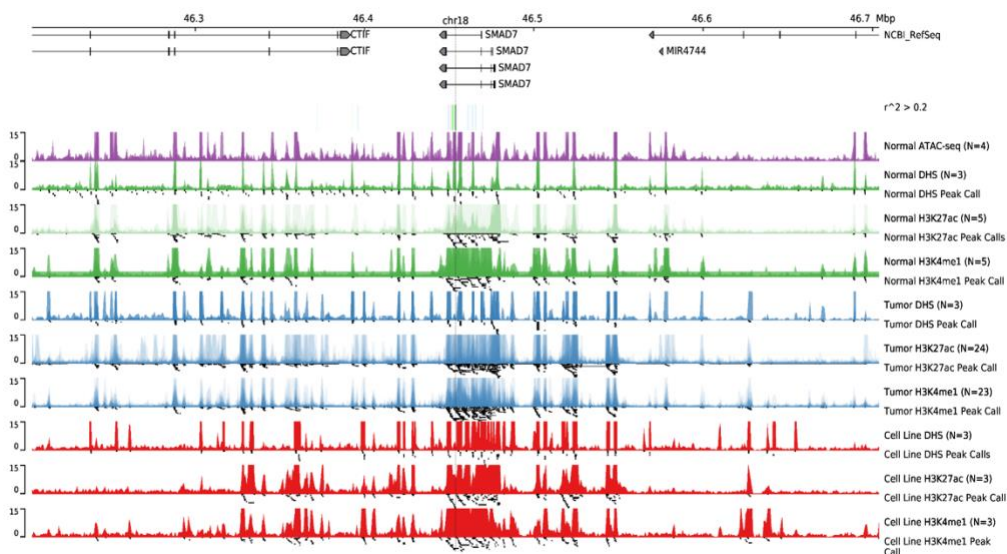

B)

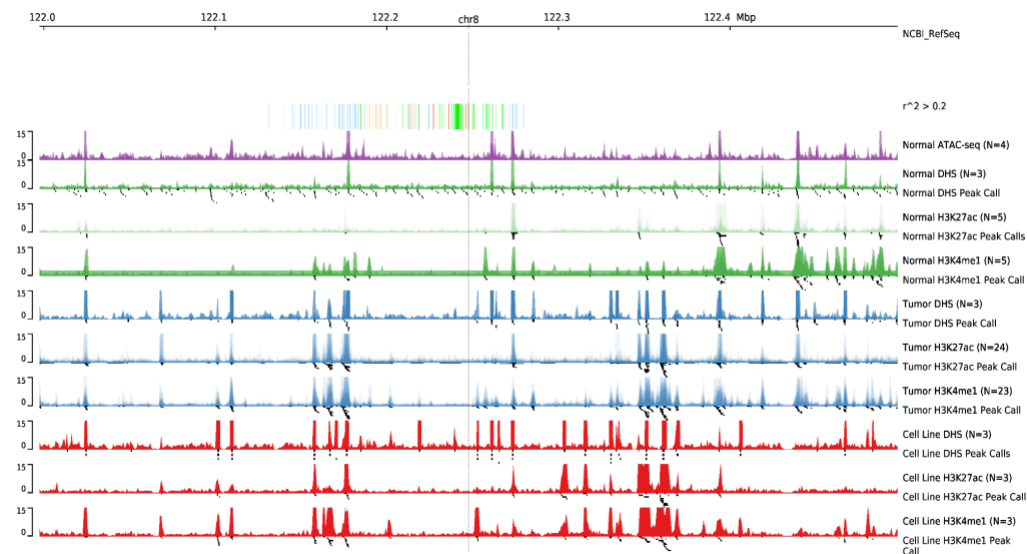

Tracks correspond to open chromatin regions assay in normal colon, tumor, and CRC cell lines. A) rs35352860 (Chr 18, intron *SMAD7*), B) rs4871179 (Chr 8, downstream *HAS2*).
